# Supplementary material
Source: publisher figshare collection journal article supplement (https://sage.figshare.com/ndownloader/files/19147040)
Supplement: Supplementary file 1 [file 19147040]

## 1 Supplemental Discussion

2

3       *The role of distractor suppression.* Distractor suppression may also play a role in

4 explaining the data from the present studies; for example, patterns of eye movements

5 might suggest that participants actively avoid distractors under certain conditions (e.g.,

6 Gaspelin, Leonard, & Luck, 2015; Moher et al., 2011). However, it is unlikely that

7 participants can simply discard the distractor immediately on distractor absent trials,

8 resulting in faster response times on distractor present trials. This explanation is

9 untenable for two reasons. First, it would not be consistent with higher miss rates on

10 target-present trials, as there should not be a cost associated with immediately

11 discarding a non-target. Second, participants have no way of knowing at the beginning

12 of a trial whether it is a target-present or target-absent trial, and thus it is highly unlikely

13 that they treat the distractor differently on target-absent compared to target-present

14 trials. Future research, including eye tracking studies, will be needed to directly test the

15 various mechanisms proposed here.

16       *Relationship to attention capture.* It is noteworthy that attentional capture

17 occurred on target-present trials in both experiments despite the positive search slopes

18 indicating that this was an inefficient search. Some have argued that attention capture

19 typically occurs only in efficient search (e.g., Theeuwes, 2004), and perhaps this is a

20 driving factor in why researchers typically use target presence searches to study

21 attentional capture. However, Gibson and Kelsey (1998; but see Yeh & Liao, 2010) put

22 forth the Displaywide Contingent Orienting Hypothesis, suggesting that onsets can

23 capture attention because onsets in the context of most psychophysical tasks indicate

24 the start of task-relevant stimulus presentation. The automaticity of capture is beyond

25 the scope of the present manuscript. Still, it would be useful to determine whether  
26 salient distractors can produce similar changes in quitting thresholds in efficient  
27 searches where capture is often more robust.

28

## References

- Gaspelin, N., Leonard, C. J., & Luck, S. J. (2015). Direct evidence for active suppression of salient-but-irrelevant sensory inputs. *Psychological science*, 26(11), 1740-1750.
- Gibson, B., & Kelsey, E. (1998). Stimulus-driven attentional capture is contingent on attentional set for displaywide visual features, 24(3), 699–706.
- Moher, J., Abrams, J., Egeth, H. E., Yantis, S., & Stuphorn, V. (2011). Trial-by-trial adjustments of top-down set modulate oculomotor capture. *Psychonomic Bulletin & Review*, 18(5), 897.
- Theeuwes, J. (2004). Top-down search strategies cannot override attentional capture. *Psychonomic Bulletin & Review*, 11, 65-70. *Psychonomic Bulletin and Review*, (11), 65–70.
- Yeh, S.-L., & Liao, H.-I. (2010). On the generality of the displaywide contingent orienting hypothesis: Can a visual onset capture attention without top-down control settings for displaywide onset? *Acta Psychologica*, 135(2), 159–167.  
<http://doi.org/10.1016/j.actpsy.2010.05.013>
